# Supplementary figures and images for: Intracellular BAPTA directly inhibits PFKFB3, thereby impeding mTORC1-driven Mcl-1 translation and killing Mcl-1-addicted cancer cells
Source: Research Square preprint supplement (doi:10.21203/rs.3.rs-1734783/v1), 2022-12-14

# Figure 3

A

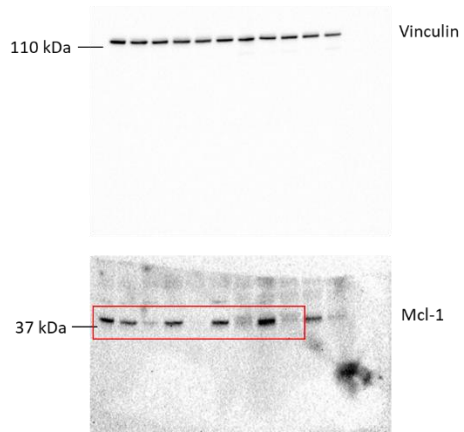

B

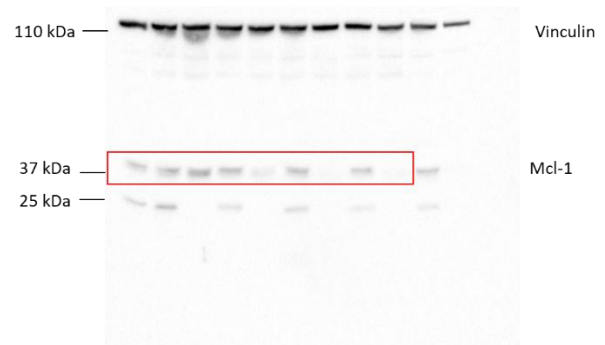

E

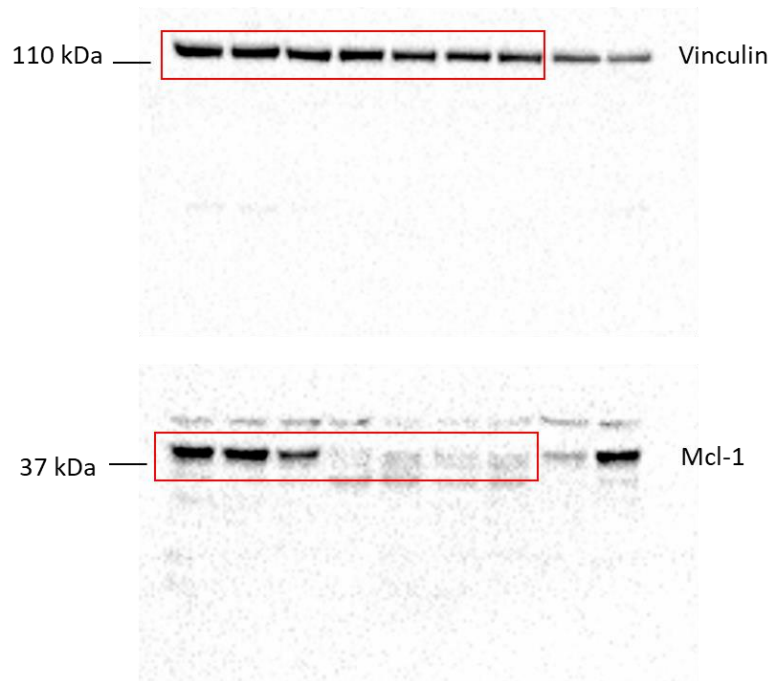

# Figure 4

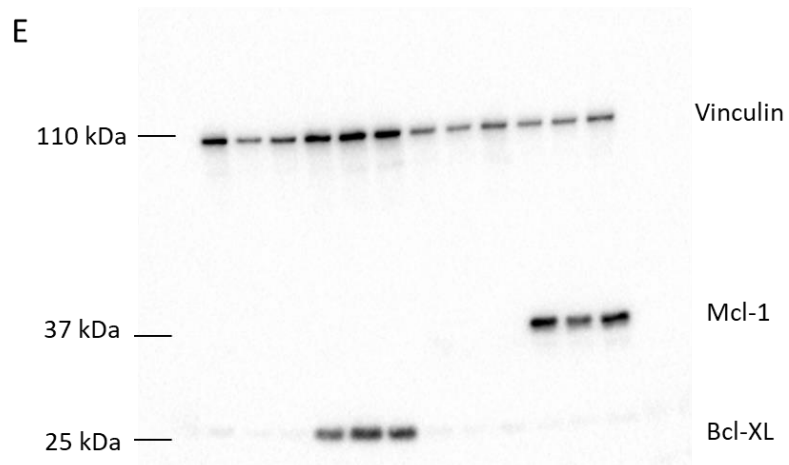

Figure 5

B

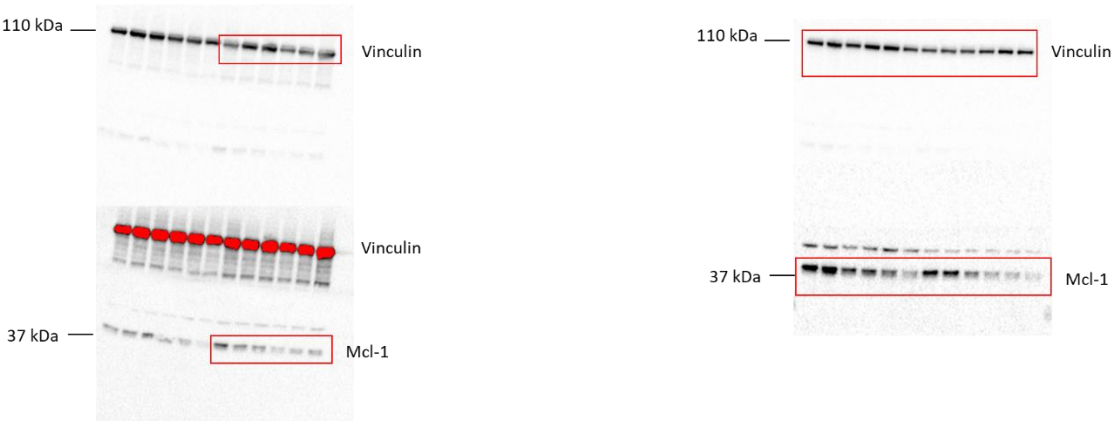

F

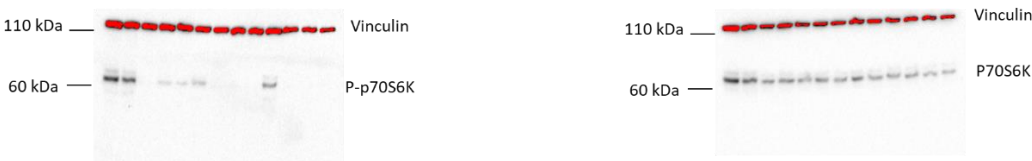

H

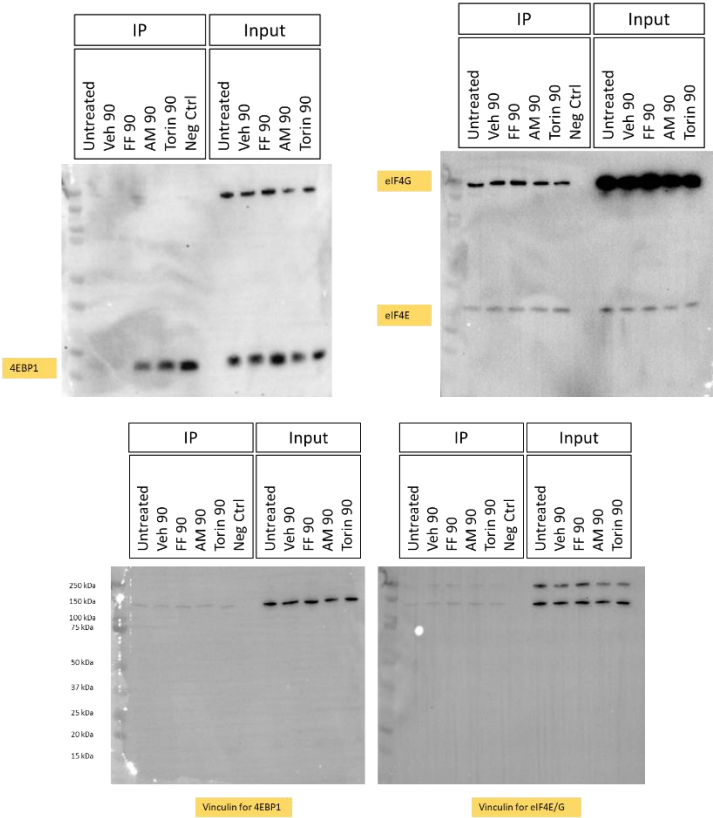

# Figure 7

E

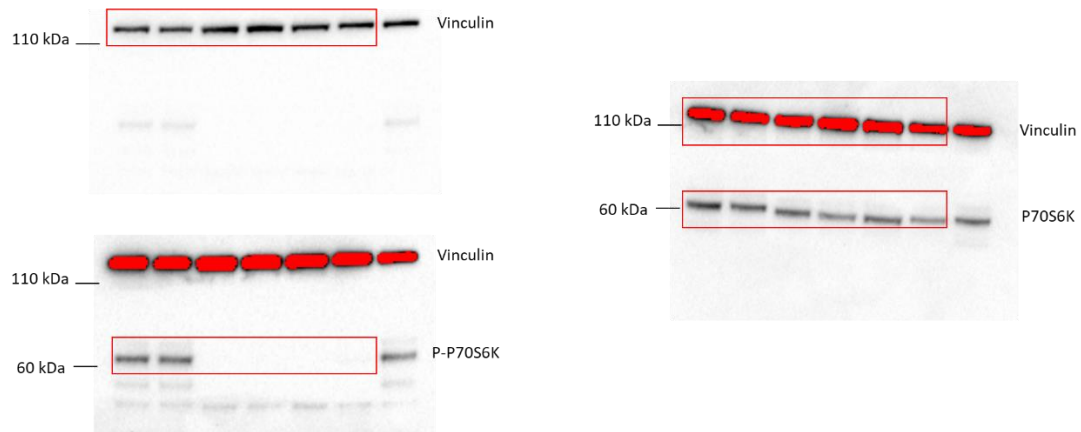

F

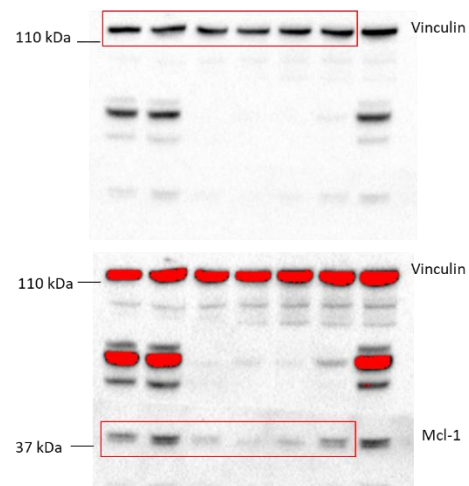

G

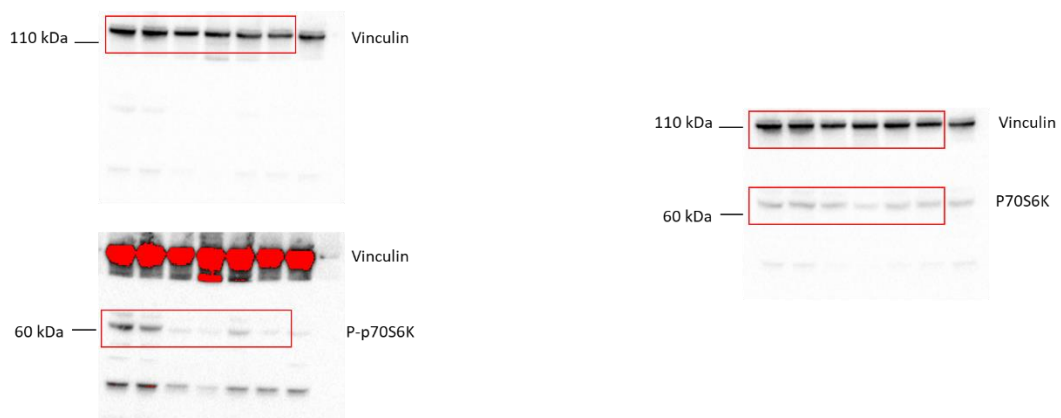

H

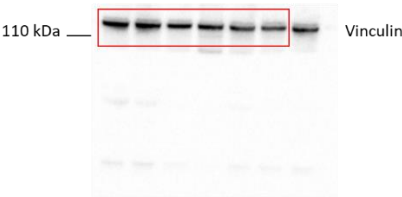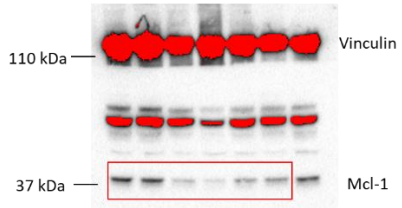

Suppl. fig. 2

B

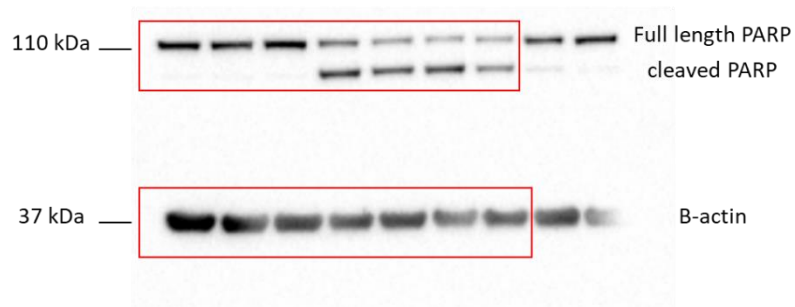

Supplement: Supplementary file 1 [file f3f10cb84eaf2e88fd5fcaee.pdf]
